# Supplementary material for: Visible-light-induced superhydrophilicity of crystallized WO3 thin films fabricated by using a newly isolated W6+ complex salt of citric acid
Source: Royal Society of Chemistry journal article supplement (doi:10.1039/d2na00717g), 2023-01-01
Supplement: d2na00717g1.pdf [file d2na00717g1.pdf]

# Visible-light-induced superhydrophilicity of crystallized $\text{WO}_3$ thin films fabricated by using a newly isolated $\text{W}^{6+}$ complex salt of citric acid

Taichi Murayama<sup>a</sup>, Mitsunobu Sato<sup>b</sup>, Hiroki Nagai<sup>a,b,\*</sup>, and Eiko Yasui<sup>c</sup>

\*nagai@cc.kogakuin.ac.jp

<sup>a</sup> Electrical and Electronics Engineering Program, Graduate School of Engineering, Kogakuin University of Technology and Engineering, Hachioji, Tokyo, 192-0015, Japan

<sup>b</sup> Department of Applied Physics, School of Advanced Engineering, Kogakuin University of Technology and Engineering, Hachioji, Tokyo, 192-0015, Japan

<sup>c</sup> Department of Chemistry and Life Science, School of Advanced Engineering, Kogakuin University of Technology and Engineering, Hachioji, Tokyo, 192-0015, Japan

**SUPPORTING INFORMATION:** S1 are the detail of Experimental. Fig. S1, Tables S1 and S2 support “3.1. Chemical characterization of dibutylammonium salt of  $\text{W}^{6+}$  complex with citrate ligands.” Tables S3 and S4 support Fig. 3. Fig. S2 and S3 support “3. 3. Surface

morphology, film thickness, and adhesion strength of thin films". Fig S2 and Table S5, S6 support Figure 4. Table S7 and S8 support 7 (a) and 7 (b), respectively.

## **S1. Experimental**

### **S1. Materials**

Citric acid (99.0%), dibutylamine (98.0%), and tungstic acid (99.9%) were purchased from FUJI-FILM Wako Pure Chemical Corporation (Miyazaki, Japan). Ethanol-d<sub>6</sub> (C<sub>2</sub>D<sub>5</sub>OD, 99 atom%) and deionized water were purchased from Tokyo Chemical Industry Co., Ltd. (Tokyo, Japan) and Kyoei Pharmaceutical Co., Ltd. (Chiba, Japan), respectively. Ethanol was purchased from Ueno Chemical Industries, Ltd. (Tokyo, Japan) and dried on 4A molecular sieves prior to use. All the other materials were used as received. Polished quartz glass (100 mm × 100 mm × 1.5 mm) was purchased from Akishima Glass Co., Ltd. (Tokyo, Japan). The quartz glass was cut to 20 mm × 20 mm × 1.5 mm and used as the substrate. The quartz glass substrates were sonicated with detergent in water for 30 min and rinsed twice with deionized water for 15 min in an ultrasonic bath to remove organic contaminants from the surfaces, followed by thorough rinsing with deionized water. Subsequently, the substrates were dried in an oven at 70°C.

### **S2. Isolation of dibutylammonium salt of W<sup>6+</sup> complex with citrate ligands**

11.64 g (60 mmol) of citric acid was dissolved in 200 g of deionized water and stirred for 5 min, and 23.74 g (180 mmol) of dibutylamine was added to the solution and stirred for 5 min. 15.01 g (60 mmol) of tungstic acid was added to the reacted solution and the mixed solution was subsequently heated at 70°C for 2 h with continuous stirring. A small amount of the white powder was filtered using a paper filter, and the filtrate was evaporated to approximately 70 g under reduced pressure. The temperature of the solution with the newly precipitated white powder was maintained at 23°C overnight. The collected powder from the solution is denoted as PPRE.

### **S3. Preparation of WO<sub>3</sub> precursor solution**

Into 3 g of ethanol, 0.78 g (0.94 mmol) of PPRE was dissolved. A clear precursor solution with the PPRE concentration of 0.25 mmol g<sup>-1</sup> was prepared by stirring at 23°C for 1 h.

### **S4. Coating and heat treatment procedures**

The precursor film was formed on a quartz glass substrate by dropping 100 μL of PS, spin-coating (1<sup>st</sup> step; 500 rpm for 5 sec, and 2<sup>nd</sup> step; 2000 rpm for 30 sec), and preheating at 70°C in a drying oven for 10 min. The precursor film was subsequently heat treated in an electric furnace 232FA (TOYO ROSHI KAISHA, Ltd., Tokyo, Japan) at 400, 500, 600 and

700°C for 30 min in air. The obtained thin films are denoted FT, where the T represents the heating temperature.

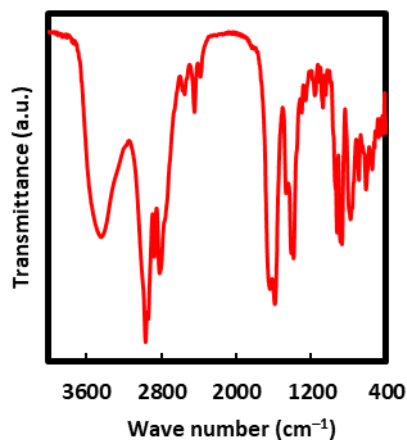

**Fig. S1** FT-IR spectrum of PPRE. 200 mg of KBr as a diluent was ground in a mortar and compressed to form a pellet for reference. Separately, 3 mg of PPRE was mixed with 200 mg of pre-ground KBr. The mixed powders were thoroughly ground in a mortar and compressed to form sample pellets. Each pellet was measured in the range of 400–4000  $\text{cm}^{-1}$  using 16 data acquisition methods.

**Table S1** The chemical shift for the  $^1\text{H}$ -NMR spectrum of PPRE in  $\text{C}_2\text{D}_5\text{OD}$  measured with tetramethylsilane as an internal standard ( $\delta = 0$  ppm).

| Chemical shift (ppm) | Signal multiplicity | Integral value | Assignment in $^1\text{H}$ -NMR spectrum                                 |
|----------------------|---------------------|----------------|--------------------------------------------------------------------------|
| 0                    | Singlet             | -              | Tetramethylsilane                                                        |
| 0.96                 | Triplet             | 9H             | $\text{CH}_3$ in $\text{Bu}_2\text{NH}_2^+$                              |
| 1.11                 | Singlet             | -              | Ethanol- $\text{d}_6$                                                    |
| 1.41                 | Sextet              | 6H             | $\text{CH}_2$ linked to $\text{CH}_3$ in $\text{Bu}_2\text{NH}_2^+$      |
| 1.71                 | Quintet             | 6H             | $\text{CH}_2$ linked only to $\text{CH}_2$ in $\text{Bu}_2\text{NH}_2^+$ |
| 2.62                 | Double doublet      | 2H             | $\text{CH}_2$ in Hcit                                                    |
| 2.96                 | Triplet             | 6H             | $\text{CH}_2$ bonded to N in $\text{Bu}_2\text{NH}_2^+$                  |
| 3.55                 | broad singlet       | -              | Ethanol- $\text{d}_6$                                                    |
| 5.30                 | broad singlet       | -              | Ethanol- $\text{d}_6$                                                    |

**Table S2** The chemical shift for the  $^{13}\text{C}$ -NMR spectrum of PPRE in  $\text{C}_2\text{D}_5\text{OD}$  measured with tetramethylsilane as an internal standard ( $\delta = 0$  ppm).

| Chemical shift (ppm) | Signal multiplicity | Assignment in $^{13}\text{C}$ -NMR spectrum                         |
|----------------------|---------------------|---------------------------------------------------------------------|
| 0                    | Singlet             | Tetramethylsilane                                                   |
| 13.99                | Singlet             | $\text{CH}_3$ in $\text{Bu}_2\text{NH}_2^+$                         |
| 17.26                | Septet              | Ethanol- $\text{d}_6$                                               |
| 20.73                | Singlet             | $\text{CH}_2$ linked to $\text{CH}_3$ in $\text{Bu}_2\text{NH}_2^+$ |
| 28.84                | Singlet             | $\text{CH}_2$ linked to $\text{CH}_2$ in $\text{Bu}_2\text{NH}_2^+$ |
| 45.51                | Singlet             | $\text{CH}_2$ in Hcit                                               |
| 48.02                | Singlet             | $\text{CH}_2$ linked to N in $\text{Bu}_2\text{NH}_2^+$             |
| 56.80                | Quintet             | Ethanol- $\text{d}_6$                                               |
| 85.91                | Singlet             | C linked to OH in Hcit                                              |
| 177.37               | Singlet             | COO linked to $\text{CH}_2$ in Hcit                                 |
| 186.29               | Singlet             | COO linked to the tertiary C in Hcit                                |

Dibutylammonium ion;  $\text{Bu}_2\text{NH}_2^+$ , Citrate ion; Hcit, Nitrogen atom; N, Carbon atom; C

**Table S3** The peak position of XRD patterns in  $20$ - $45^\circ$  of the thin films obtained at several temperatures (F500, F600, and F700) and ICDD of triclinic (ICDD: No. 01-071-0305), monoclinic (ICDD: No. 01-083-0950) or orthorhombic (ICDD: No. 01-089-4477)  $\text{WO}_3$ .

|                     | $2\theta$    |              |              |              |              |              |              |              |
|---------------------|--------------|--------------|--------------|--------------|--------------|--------------|--------------|--------------|
| <b>F500</b>         | <b>23.46</b> | <b>24.37</b> |              | <b>28.96</b> | <b>34.10</b> | <b>35.64</b> | <b>41.77</b> |              |
| <b>F600</b>         | <b>23.50</b> | <b>24.46</b> | <b>26.85</b> | <b>29.07</b> | <b>34.27</b> | <b>35.77</b> | <b>41.90</b> | <b>44.42</b> |
| <b>F700</b>         | <b>23.37</b> | <b>24.55</b> | <b>26.85</b> | <b>29.12</b> | <b>34.39</b> | <b>35.89</b> | <b>42.03</b> | <b>44.49</b> |
| <b>Triclinic</b>    | <b>23.64</b> | <b>24.34</b> | <b>26.27</b> | <b>29.09</b> | <b>34.12</b> | <b>35.92</b> | <b>41.88</b> | <b>44.61</b> |
| <b>Monoclinic</b>   | <b>23.58</b> | <b>24.37</b> | <b>26.59</b> | <b>28.93</b> | <b>34.17</b> | <b>35.65</b> | <b>41.89</b> | <b>44.70</b> |
| <b>Orthorhombic</b> | <b>23.47</b> | <b>24.25</b> | <b>26.47</b> | <b>29.40</b> | <b>34.01</b> | <b>35.73</b> | <b>41.73</b> | <b>44.56</b> |

**Table S4** The peak position of XRD patterns in 45-60° of the thin films obtained at several temperatures (F500, F600, and F700) and ICDD of triclinic (ICDD: No. 01-071-0305), monoclinic (ICDD: No. 01-083-0950) or orthorhombic (ICDD: No. 01-089-4477) WO<sub>3</sub>.

|                     | <b>2θ</b>    |              |              |              |              |              |              |              |
|---------------------|--------------|--------------|--------------|--------------|--------------|--------------|--------------|--------------|
| <b>F500</b>         | <b>45.59</b> | <b>47.35</b> |              | <b>49.68</b> | <b>50.50</b> | <b>53.85</b> | <b>55.59</b> |              |
| <b>F600</b>         | <b>45.81</b> | <b>47.54</b> |              | <b>49.93</b> | <b>50.77</b> | <b>54.00</b> | <b>55.82</b> | <b>58.16</b> |
| <b>F700</b>         | <b>46.06</b> | <b>47.49</b> | <b>48.51</b> | <b>50.08</b> | <b>50.83</b> | <b>54.06</b> | <b>56.11</b> | <b>58.41</b> |
| <b>Triclinic</b>    | <b>45.99</b> | <b>47.34</b> | <b>48.38</b> | <b>49.88</b> | <b>50.62</b> | <b>54.05</b> | <b>55.66</b> | <b>58.15</b> |
| <b>Monoclinic</b>   | <b>45.74</b> | <b>47.25</b> | <b>48.25</b> | <b>49.93</b> | <b>50.72</b> | <b>54.15</b> | <b>55.62</b> | <b>58.17</b> |
| <b>Orthorhombic</b> | <b>45.46</b> | <b>46.92</b> | <b>48.25</b> | <b>49.93</b> | <b>50.72</b> | <b>54.15</b> | <b>55.66</b> | <b>58.17</b> |

**Table S5** The binding energies and the peak areas of deconvoluted W 4f and of O 1s peaks of F500, F600, and F700 before Vis-light irradiation.

| Films | Binding energy (eV) |                   |                   |                   |                 |                 | Peak area                         |                 |      | O/W<br>area<br>ratio |
|-------|---------------------|-------------------|-------------------|-------------------|-----------------|-----------------|-----------------------------------|-----------------|------|----------------------|
|       | W <sup>5+</sup>     |                   | W <sup>6+</sup>   |                   | O <sup>2-</sup> | OH              | W <sup>6+</sup> 4f <sub>7/2</sub> | O 1s            |      |                      |
|       | 4f <sub>7/2</sub>   | 4f <sub>5/2</sub> | 4f <sub>7/2</sub> | 4f <sub>5/2</sub> | O 1s            | O <sup>2-</sup> |                                   | OH <sup>-</sup> |      |                      |
|       |                     |                   |                   |                   |                 |                 |                                   |                 |      |                      |
| F500  | 34.8                | 35.7              |                   |                   |                 | 531.8           | 25230                             | 33060           | 4525 |                      |
| F600  | 34.6                | 36.0              | 35.3              | 37.4              | 530.2           | 531.7           | 25796                             | 33830           | 3064 | 2.90                 |
| F700  | 34.7                | 36.4              |                   | 37.5              |                 | 531.8           | 26204                             | 34405           | 3074 |                      |

**Table S6** The binding energies and the peak areas of deconvoluted W 4f and of O 1s peaks of F500, F600, and F700 after Vis-light irradiation at a RH range of 40–50% for 20 min.

| Films | Binding energy (eV) |                   |                   |                   |                 |       | Peak area                         |                 |      | O/W<br>area<br>ratio |
|-------|---------------------|-------------------|-------------------|-------------------|-----------------|-------|-----------------------------------|-----------------|------|----------------------|
|       | W <sup>5+</sup>     |                   | W <sup>6+</sup>   |                   | O <sup>2-</sup> | OH    | W <sup>6+</sup> 4f <sub>7/2</sub> | O <sup>2-</sup> |      |                      |
|       | 4f <sub>7/2</sub>   | 4f <sub>5/2</sub> | 4f <sub>7/2</sub> | 4f <sub>5/2</sub> | O 1s            | O 1s  |                                   | OH <sup>-</sup> |      |                      |
|       |                     |                   |                   |                   |                 |       |                                   |                 |      |                      |
| F500  | 34.7                | 35.7              |                   |                   |                 | 531.8 | 26655                             | 35019           | 1528 |                      |
| F600  | 34.6                | 36.1              | 35.3              | 37.4              | 530.3           | 531.7 | 25691                             | 33715           | 1382 | 2.90                 |
| F700  | 34.7                | 36.3              |                   |                   |                 |       | 25431                             | 33380           | 2251 |                      |

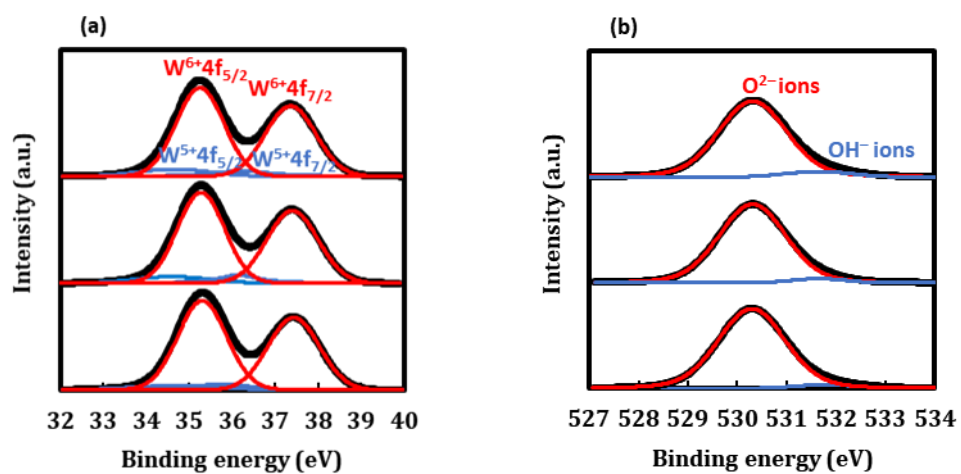

**Fig. S2** High-resolution XPS spectra of (a) W 4f, (b) O 1s of the thin films obtained by heating at several temperatures (F500 (Bottom lines), F600 (Middle lines), and F700 (Top lines)) after Vis-light irradiation at a RH range of 40–50% for 20 min. The thick bold line indicates the original XPS data, whereas the colored line indicates the theoretical fitted curve assuming a Voigt distribution.



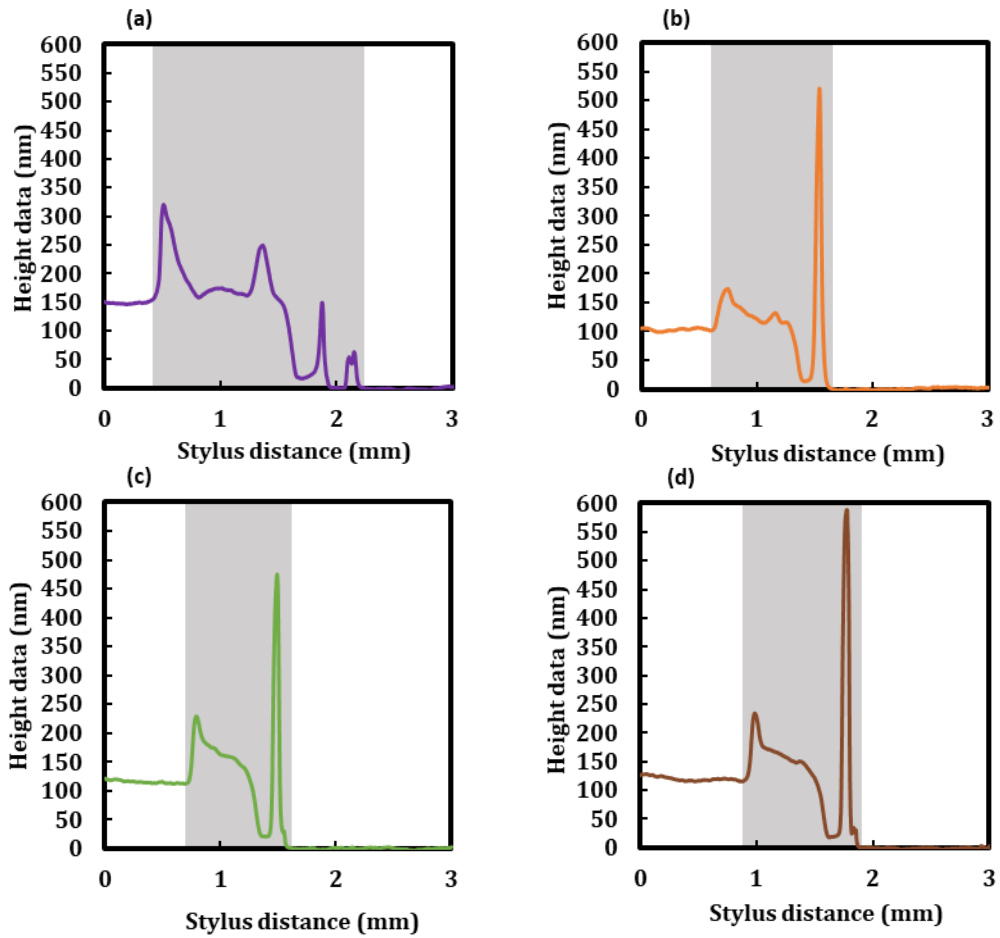

**Fig. S3** The hysteresis curve of film thickness for the thin films obtained by heating at several temperatures (a) F400, (b) F500, (c) F600, and (d) F700. The film thickness is the difference between the height of two white backgrounds (light; film, right; substrate).

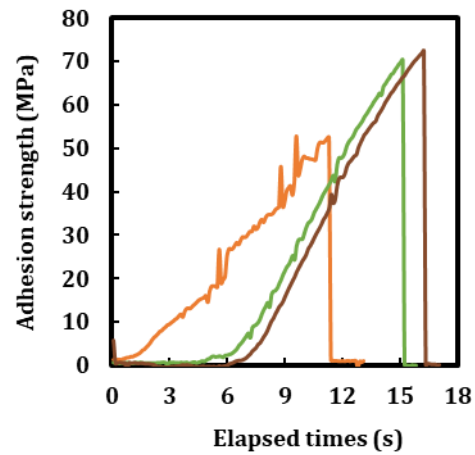

**Fig. S4** The hysteresis curve of adhesion strengths for F500, F600, and F700 on the quartz glass substrate was shown. The adhesion strength was examined using a stud-pull adhesion test. A stand pin, P/N901106, with an internal diameter of 2.7 mm was attached to the film using epoxy glue and placed in an oven at 150°C for 1 h. The test was subsequently performed by pulling the stand pin with a load ranging from 0 to 100 kg at

**Table S7** Photographs of water contact angles for the thin films obtained by heating at several temperatures F400, F500, F600, and F700 after 1, 2, and 3 days of irradiation to visible light at temperatures ranging from 20–25°C and humidity ranging from 20–25%, and after 1 day of storage in the dark at the same temperature and humidity.

| Films | Before Vis-light irradiation                                                                    | After visible-light irradiation                                                                  |                                                                                                    |                                                                                                   | After 1-day storage in the dark                                                                   |
|-------|-------------------------------------------------------------------------------------------------|--------------------------------------------------------------------------------------------------|----------------------------------------------------------------------------------------------------|---------------------------------------------------------------------------------------------------|---------------------------------------------------------------------------------------------------|
|       |                                                                                                 | 1 day                                                                                            | 2day                                                                                               | 3 day                                                                                             |                                                                                                   |
|       |                                                                                                 |                                                                                                  |                                                                                                    |                                                                                                   |                                                                                                   |
| F400  | 62° ± 1°<br>   | 55° ± 1°<br>    | 55° ± 1°<br>    | 56° ± 1°<br>   | 55° ± 1°<br>   |
| F500  | 61° ± 4°<br> | 17° ± 1°<br>  | 10° ± 1°<br>  | 7° ± 1°<br>  | 31° ± 2°<br> |
| F600  | 64° ± 4°<br> | 18° ± 9°<br>  | 9° ± 4°<br>   | 7° ± 1°<br>  | 32° ± 2°<br> |
| F700  | 61° ± 1°<br> | 21° ± 11°<br> | 13° ± 10°<br> | 10° ± 7°<br> | 33° ± 1°<br> |

**Table S8** Photographs of water contact angles for the thin films obtained by heating at several temperatures F400, F500, F600, and F700 after 10, 20, and 30 minutes of irradiation to visible light at temperatures ranging from 20–25°C and humidity ranging from 40–50%, and after 1 day of storage in the dark at the same temperature and humidity.

| Films | Before Vis-light irradiation                                                                    | After visible-light irradiation                                                                |                                                                                                 |                                                                                                  |                                                                                                  | After 1-day storage in the dark                                                                   |
|-------|-------------------------------------------------------------------------------------------------|------------------------------------------------------------------------------------------------|-------------------------------------------------------------------------------------------------|--------------------------------------------------------------------------------------------------|--------------------------------------------------------------------------------------------------|---------------------------------------------------------------------------------------------------|
|       |                                                                                                 | 10 min                                                                                         | 20 min                                                                                          | 30 min                                                                                           | 60 min                                                                                           |                                                                                                   |
| F400  | 70° ± 3°<br>   | 57° ± 4°<br>  | 54° ± 2°<br>  | 51° ± 2°<br>  | 49° ± 3°<br>  | 56° ± 3°<br>   |
| F500  | 23° ± 3°<br>   | 11° ± 2°<br>  | 8° ± 1°<br>   | 7° ± 1°<br>   | 5° ± 1°<br>   | 12° ± 1°<br>   |
| F600  | 23° ± 2°<br> | 8° ± 1°<br> | 6° ± 1°<br> | 5° ± 1°<br> | 5 ± 1°<br>  | 13° ± 1°<br> |
| F700  | 24° ± 1°<br> | 8° ± 1°<br> | 6° ± 1°<br> | 5° ± 1°<br> | 4° ± 1°<br> | 13° ± 1°<br> |
